# Supplementary material
Source: PubMed Central journal article supplement (PMC4965584)
Supplement: 10.1074_M116.735431_jbc.M116.735431-1.pdf [file 10.1074_M116.735431_jbc.M116.735431-1.pdf]

# Supplemental Material

## LIGAND BINDING ENSEMBLES DETERMINE GRADED AGONIST EFFICACIES AT A G PROTEIN-COUPLED RECEPTOR

Andreas Bock<sup>1,§,\*</sup>, Marcel Bermudez<sup>2,§,\*</sup>, Fabian Krebs<sup>3</sup>, Carlo Matera<sup>4</sup>, Brian Chirinda<sup>3</sup>, Dominique Sydow<sup>2</sup>, Clelia Dallanocce<sup>4</sup>, Ulrike Holzgrabe<sup>5</sup>, Marco De Amici<sup>4</sup>, Martin Lohse<sup>1</sup>, Gerhard Wolber<sup>2</sup> and Klaus Mohr<sup>3,\*</sup>

<sup>1</sup> Institute of Pharmacology and Toxicology, University of Würzburg, Versbacher Strasse 9, 97078 Würzburg, Germany

<sup>2</sup> Institute of Pharmacy, Freie Universität Berlin, Königin-Luise-Straße 2 und 4, 14195 Berlin, Germany

<sup>3</sup> Pharmacology and Toxicology Section, Institute of Pharmacy, University of Bonn, Gerhard-Domagk-Straße 3, 53121 Bonn, Germany

<sup>4</sup> Dipartimento di Scienze Farmaceutiche, Sezione di Chimica Farmaceutica "Pietro Pratesi", Università degli Studi di Milano, Via Mangiagalli 25, 20133 Milan, Italy

<sup>5</sup> Institute of Pharmacy, University of Würzburg, Am Hubland, 97074 Würzburg, Germany

<sup>§</sup> These authors contributed equally to this work



recorded on a Varian 320 LC-MS/MS instrument. Data are reported as mass-to-charge ratio ( $m/z$ ) of the corresponding positively charged molecular ions.

1,4-Bis-(3-bromo-1-prop-1yn-1y)benzene **1** was prepared following a published protocol (1). Tertiary amine **2** (2) and dimethylamino- $\Delta^2$ -isoxazoline **4** (3,4) were synthesized according to known procedures. Intermediate **3** was obtained in 87% yield by refluxing an acetonitrile solution containing **2** and a five-fold excess of dibromo-derivative **1**. Treatment of **3** with **4** in similar experimental conditions provided the dualsteric muscarinic ligand **5** (iper-rigid-naph) in 71% yield (**Supplementary Figure 1**).

**3-(4-(3-Bromoprop-1-yn-1-yl)phenyl)-N-(3-(1,3-dioxo-1H-benzo[de]isoquinolin-2(3H)-yl)-2,2-dimethylpropyl)-N,N-dimethylprop-2-yn-1-aminium Bromide [3]**

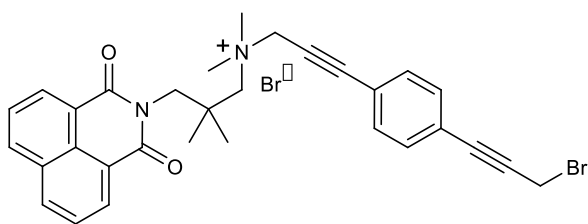

A solution of 1,4-bis(3-bromoprop-1-yn-1-yl)benzene **1** (2.63 g, 8.44 mmol) and 2-(3-(dimethylamino)-2,2-dimethylpropyl)-1H-benzo[de]isoquinoline-1,3(2H)-dione **2** (524 mg, 1.69 mmol) in acetonitrile (35 mL) was refluxed for 18 h in a sealed glass reaction vessel (TLC in dichloromethane/methanol 9:1). The reaction mixture was then allowed to cool down to room temperature. After removing the clear supernatant containing most of the excess reagent, the precipitate was recrystallized twice from acetonitrile/diethyl ether to afford the desired product as a colorless solid (918 mg, 87% yield). Mp: 199-202 °C dec.  $^1\text{H}$  NMR (300 MHz,  $\text{CD}_3\text{OD}$ ):  $\delta$  (ppm) 8.48 (dd,  $J = 7.3, 1.2$  Hz, 2H, naph.), 8.36 (dd,  $J = 8.4, 1.2$  Hz, 2H, naph.), 7.78 (dd,  $J = 8.3, 7.3$  Hz, 2H, naph.), 7.24 (d,  $J = 8.3$  Hz, 2H, arom.), 7.16 (d,  $J = 8.4$  Hz, 2H, arom.), 4.66 (s, 2H,  $\equiv\text{C}-\text{CH}_2\text{Br}$ ), 4.36 (s, 2H,  $\equiv\text{C}-\text{CH}_2\text{N}^+$ ), 4.26 (s, 2H,  $\text{C}-\text{CH}_2\text{N}^+$ ), 3.71 (s, 2H,  $\text{C}-\text{CH}_2\text{N}$ (naph.)), 3.40 (s, 6H,  $(\text{CH}_3)_2\text{N}^+$ ), 1.44 (s, 6H,  $(\text{CH}_3)_2\text{C}$ ).  $^{13}\text{C}$  NMR (75 MHz,  $\text{CD}_3\text{OD}$ ):  $\delta$  (ppm) 166.71 (C=O, naph.), 135.83 (naph.), 133.09 (naph.), 132.74 (arom.), 132.56 (naph.), 129.17 (naph.), 128.23 (naph.), 125.09 (arom.), 123.34 (naph.), 121.59 (arom.), 92.75 ( $\equiv\text{C}-\text{CH}_2$ ), 88.63 ( $\equiv\text{C}-\text{CH}_2$ ), 86.08 ( $\equiv\text{C}-\text{Ar}$ ), 79.47 ( $\equiv\text{C}-\text{Ar}$ ),

73.10 (C-CH<sub>2</sub>N<sup>+</sup>), 58.71 (C-CH<sub>2</sub>N(napht.)), 53.91 (≡C-CH<sub>2</sub>N<sup>+</sup>), 50.79 ((CH<sub>3</sub>)<sub>2</sub>N<sup>+</sup>), 40.53 ((CH<sub>3</sub>)<sub>2</sub>C), 26.01 ((CH<sub>3</sub>)<sub>2</sub>C), 15.24 (≡C-CH<sub>2</sub>Br). MS (ESI) *m/z* [M]<sup>+</sup> Calcd for C<sub>31</sub>H<sub>30</sub>BrN<sub>2</sub>O<sub>2</sub><sup>+</sup>: 541.15. Found: 541.2.

**4-((4,5-Dihydroisoxazol-3-yl)oxy)-N-(3-(4-(3-((3-(1,3-dioxo-1*H*-benzo[de]isoquinolin-2(3*H*)-yl)-2,2-dimethylpropyl)dimethylammonio)prop-1-yn-1-yl)phenyl)prop-2-yn-1-yl)-N,N-dimethylbut-2-yn-1-aminium Dibromide [5]**

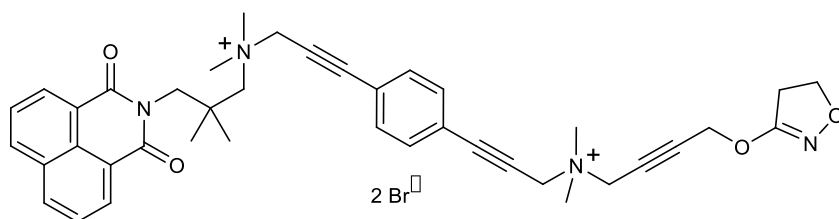

A solution of **4** (157 mg, 0.86 mmol) and **3** (448 mg, 0.72 mmol) in acetonitrile (7 mL) was refluxed for 18 h in a sealed glass reaction vessel (TLC in dichloromethane/methanol 9:1). The reaction mixture was then allowed to cool down to room temperature. After removing the clear supernatant, the yellowish precipitate was recrystallized from acetonitrile/diethyl ether to afford **5** (iper-rigid-naph) as a light yellow hygroscopic solid (411 mg, 71% yield). <sup>1</sup>H NMR (300 MHz, CD<sub>3</sub>OD): δ (ppm) 8.54 (dd, *J* = 7.3, 1.0 Hz, 2H, napht.), 8.38 (dd, *J* = 8.3, 1.0 Hz, 2H, napht.), 7.81 (dd, *J* = 8.3, 7.3 Hz, 2H, napht.), 7.48-7.41 (m, 4H, arom.), 4.96 (s, 2H, -OCH<sub>2</sub>-C≡), 4.74 (s, 2H, ≡C-CH<sub>2</sub>N<sup>+</sup>), 4.70 (s, 2H, ≡C-CH<sub>2</sub>N<sup>+</sup>), 4.58 (s, 2H, ≡C-CH<sub>2</sub>N<sup>+</sup>), 4.40 (t, *J* = 9.6 Hz, 2H, -OCH<sub>2</sub>-, isox.), 4.32 (s, 2H, C-CH<sub>2</sub>N<sup>+</sup>), 3.74 (s, 2H, C-CH<sub>2</sub>N(napht.)), 3.42 (s, 6H, (CH<sub>3</sub>)<sub>2</sub>N<sup>+</sup>), 3.36 (s, 6H, (CH<sub>3</sub>)<sub>2</sub>N<sup>+</sup>), 3.03 (t, *J* = 9.6 Hz, 2H, -CH<sub>2</sub>-, isox.), 1.43 (s, 6H, (CH<sub>3</sub>)<sub>2</sub>C). <sup>13</sup>C NMR (75 MHz, CD<sub>3</sub>OD): δ (ppm) 168.74 (-C=N-, isox.), 166.66 (C=O, napht.), 135.80 (napht.), 133.28 (napht.), 133.08 (arom.), 133.05 (arom.), 132.56 (napht.), 129.16 (napht.), 128.26 (napht.), 123.36 (napht.), 123.15 (arom.), 122.99 (arom.), 92.37 (≡C-CH<sub>2</sub>), 91.99 (≡C-CH<sub>2</sub>), 88.42 (≡C-CH<sub>2</sub>), 80.10 (≡C-CH<sub>2</sub>), 79.51 (≡C-Ar), 76.37 (≡C-Ar), 73.36 (C-CH<sub>2</sub>N<sup>+</sup>), 71.21 (-OCH<sub>2</sub>-, isox.), 58.90 (C-CH<sub>2</sub>N(napht.)), 58.33 (≡C-CH<sub>2</sub>N<sup>+</sup>), 55.84 (≡C-CH<sub>2</sub>N<sup>+</sup>), 55.37 (≡C-CH<sub>2</sub>N<sup>+</sup>), 53.88 ((CH<sub>3</sub>)<sub>2</sub>N<sup>+</sup>), 51.14 ((CH<sub>3</sub>)<sub>2</sub>N<sup>+</sup>), 50.54 (-OCH<sub>2</sub>-C≡), 40.50 ((CH<sub>3</sub>)<sub>2</sub>C), 33.66 (-CH<sub>2</sub>-, isox.), 26.15 ((CH<sub>3</sub>)<sub>2</sub>C). MS (ESI) *m/z* [M]<sup>2+</sup> Calcd for C<sub>40</sub>H<sub>44</sub>N<sub>4</sub>O<sub>4</sub><sup>2+</sup>: 322.17. Found: 322.3.

## Supplementary References

1. Werner, C., Hopf, H., Dix, I., Bubenitschek, P., and Jones, P. G. (2007) 1,x-elimination reactions: extending the limits of a classical organic reaction. *Chemistry* **13**, 9462-9477
2. Muth, M., Bender, W., Scharfenstein, O., Holzgrabe, U., Balatkova, E., Trankle, C., and Mohr, K. (2003) Systematic development of high affinity bis(ammonio)alkane-type allosteric enhancers of muscarinic ligand binding. *J. Med. Chem.* **46**, 1031-1040
3. Dallanoce, C., Conti, P., De Amici, M., De Micheli, C., Barocelli, E., Chiavarini, M., Ballabeni, V., Bertoni, S., and Impicciatore, M. (1999) Synthesis and functional characterization of novel derivatives related to oxotremorine and oxotremorine-M. *Bioorg. Med. Chem.* **7**, 1539-1547
4. Kloeckner, J., Schmitz, J. & Holzgrabe, U. . (2010) Convergent, short synthesis of the muscarinic superagonist iperoxo. *Tetrahedr. Lett.* **51**, 3470-3472
